# Supplementary material for: Optical control of Er3+-doped M0.5Bi2.5Nb2O9 (M = Li, Na, K) materials for thermal stability and temperature sensing using photochromic reactions
Source: Royal Society of Chemistry journal article supplement (doi:10.1039/d0tc03894f), 2020-01-01
Supplement: d0tc03894f1.pdf [file d0tc03894f1.pdf]

## Supporting Information

### **Optical control of Er<sup>3+</sup> doped M<sub>0.5</sub>Bi<sub>2.5</sub>Nb<sub>2</sub>O<sub>9</sub> (M=Li, Na, K) materials for thermal stability and temperature sensing using photochromic reactions**

Xuefeng Li,<sup>a</sup> Lili Guan,<sup>a</sup> Yong Li,<sup>a</sup> Haiqin Sun,<sup>\*a</sup> Qiwei Zhang,<sup>\*a,b</sup> Xihong Hao<sup>a,b</sup>

<sup>a</sup> Inner Mongolia Key Laboratory of Ferroelectric-related New Energy Materials and Devices,  
School of Materials and Metallurgy, Inner Mongolia University of Science and Technology, 7#  
Aerding Street, Kun District, Baotou 014010, China.

<sup>b</sup> Key Laboratory of Integrated Exploitation of Bayan Obo Multi-Metal Resources, Inner  
Mongolia University of Science and Technology, Baotou 014010, China.

\*E-mail: a8082sz@imust.edu.cn (HQ Sun); zqw8000@imust.edu.cn (QW Zhang).

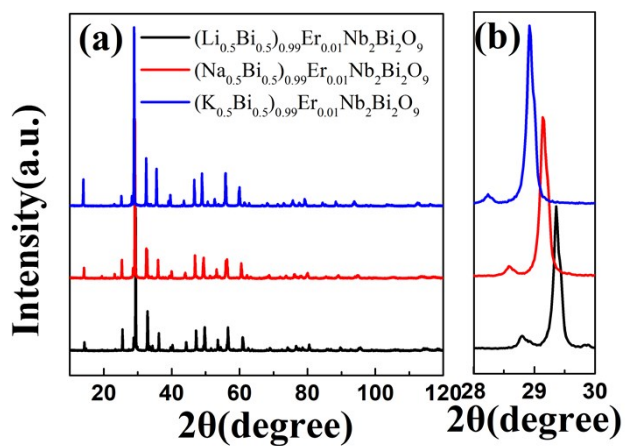

**Fig. S1.** (a) XRD patterns of Er doped  $\text{M}_{0.5}\text{Bi}_{2.5}\text{Nb}_2\text{O}_9$  ceramics. (b) zoomed XRD patterns at 28-30°.

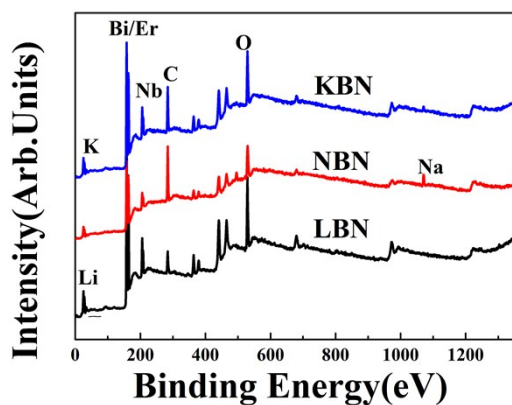

**Fig. S2** XPS full spectra of  $\text{M}_{0.5}\text{Bi}_{2.5}\text{Nb}_2\text{O}_9$  (M=Li,Na,K) materials.

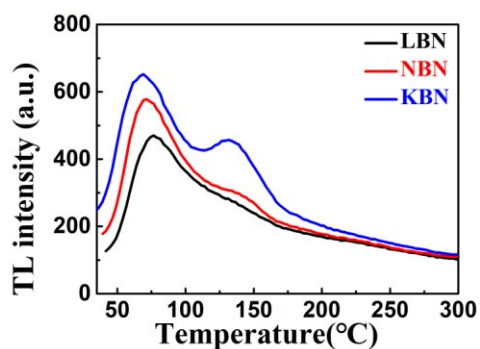

**Fig. S3** TL curves of Er doped  $(\text{A}_{0.5}\text{Bi}_{0.5})\text{Nb}_2\text{Bi}_2\text{O}_9$  (A=Li, Na, K) ceramics.

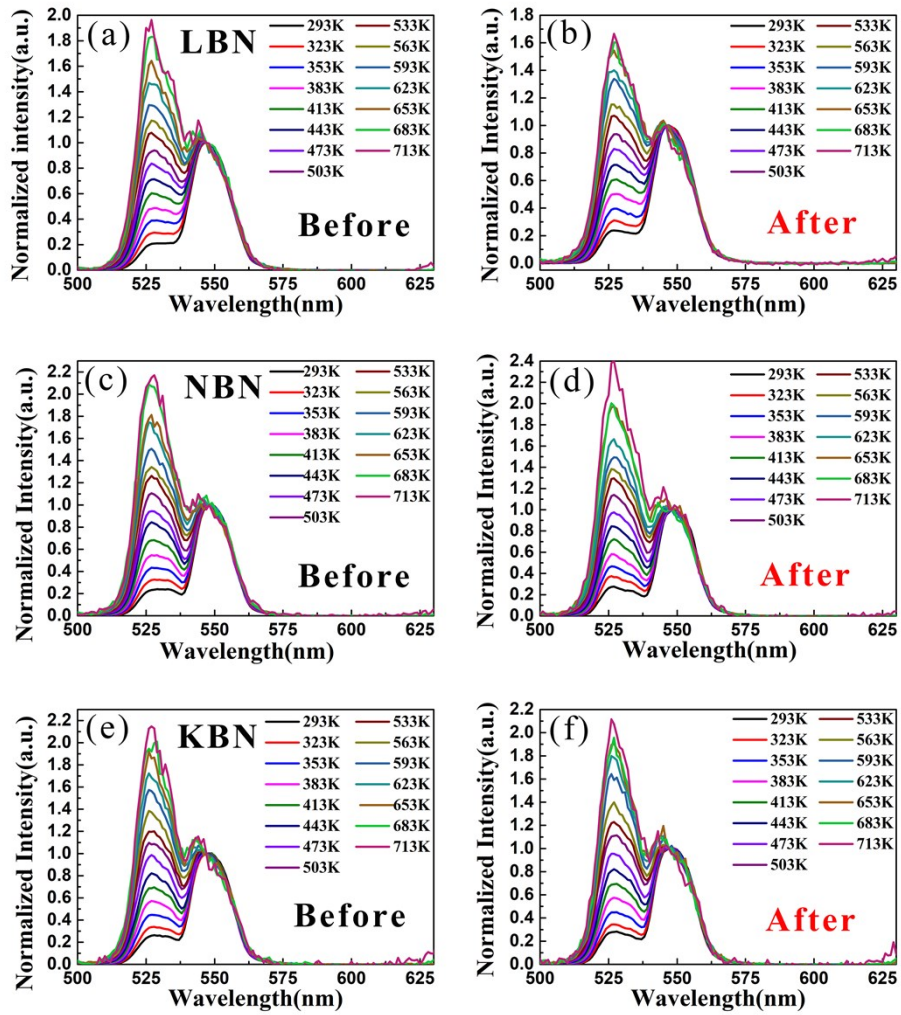

**Fig. S4.** (a), (c) and (e) The normalized temperature-dependent UC emission spectra of  $\text{Er}^{3+}$  doped  $\text{M}_{0.5}\text{Bi}_{2.5}\text{Nb}_2\text{O}_9$  ceramics at various temperatures of 293-713 K before 405nm irradiation. (b), (d) and (f) The normalized temperature-dependent UC emission spectra of  $\text{Er}^{3+}$  doped  $\text{M}_{0.5}\text{Bi}_{2.5}\text{Nb}_2\text{O}_9$  ceramics after 405nm irradiation.

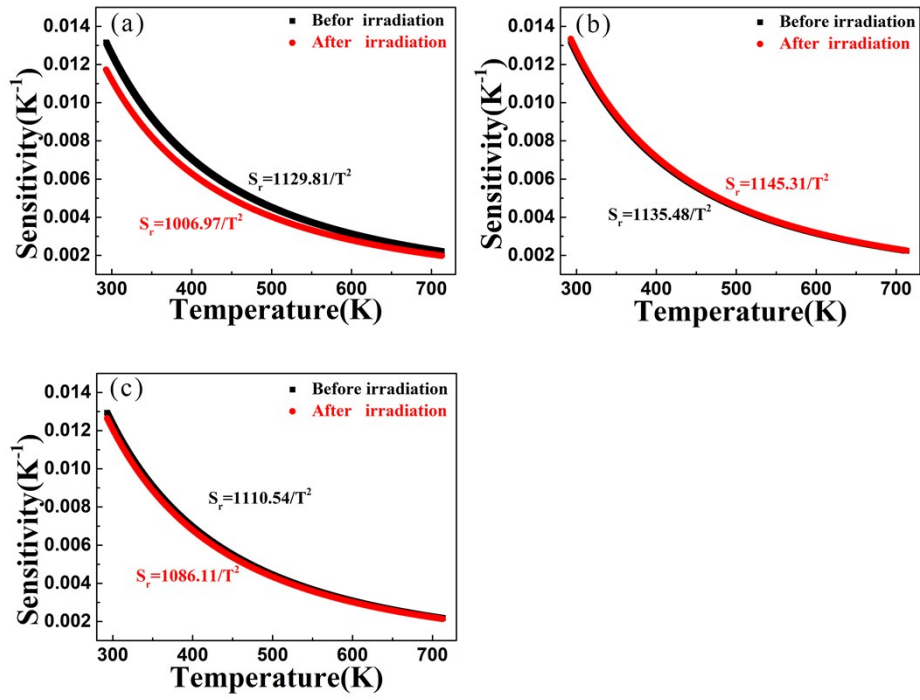

**Fig. S5.** The relative sensitivity ( $S_r$ ) dependence on temperature before and after irradiation, (a)

LBN, (b) NBN, and (c) KBN.

**Table S1.** The fitted parameters of Er doped  $M_{0.5}Bi_{2.5}Nb_2O_9$  (M=Li,Na,K) materials based on the

| Samples            | LBN      | NBN      | KBN      |
|--------------------|----------|----------|----------|
| a(Å)               | 5.4489   | 5.4950   | 5.4982   |
| b(Å)               | 5.4412   | 5.4578   | 5.4958   |
| c(Å)               | 24.7942  | 24.9311  | 25.2255  |
| V(Å <sup>3</sup> ) | 735.1126 | 747.6933 | 762.2444 |
| W <sub>tp</sub>    | 0.1604   | 0.1286   | 0.1457   |
| R <sub>p</sub>     | 0.1150   | 0.936    | 0.1112   |
| X <sup>2</sup>     | 1.756    | 1.234    | 1.646    |

GSAS-EXPGUI software.

**Table S2.** Fitting parameters of the O<sub>1s</sub> spectra of Er doped  $M_{0.5}Bi_{2.5}Nb_2O_9$  (M=Li, Na, K) materials.

| Samples                                                            | Lattice O<br>(O <sup>2-</sup> ) | Absorbed O<br>(*Vo) | Vo/O <sup>2-</sup><br>- |
|--------------------------------------------------------------------|---------------------------------|---------------------|-------------------------|
| Li <sub>0.5</sub> Bi <sub>2.5</sub> Nb <sub>2</sub> O <sub>9</sub> | 529.55                          | 531.33              | 1.6295                  |
| Na <sub>0.5</sub> Bi <sub>2.5</sub> Nb <sub>2</sub> O <sub>9</sub> | 529.41                          | 531.31              | 1.0473                  |
| K <sub>0.5</sub> Bi <sub>2.5</sub> Nb <sub>2</sub> O <sub>9</sub>  | 529.54                          | 531.31              | 0.8604                  |

**Table S3.** The distribution of the defect depths for LBN, NBN, and KBN samples

| Samples | $\Delta E_1$ (eV) | $\Delta E_2$ (eV) | $\Delta E_3$ (eV) | $\Delta E_4$ (eV) |
|---------|-------------------|-------------------|-------------------|-------------------|
| LBN     | 0.69(342.79K)     | 0.72(361.47K)     | 0.79(396.53K)     | 0.93(462.74K)     |
| NBN     | 0.68(338.79K)     | 0.71(357.23K)     | 0.80(342.79K)     | 0.93(462.89K)     |
| KBN     | 0.67(333.10K)     | 0.70(352.80K)     | 0.81(403.49K)     | 0.94(467.88K)     |

**Table S4.** Fitting parameters of the decay lifetime curves in  $\text{Er}^{3+}$  doped  $\text{M}_{0.5}\text{Bi}_{2.5}\text{Nb}_2\text{O}_9$  ceramics

| Samples | $\tau_1$ ( $\mu\text{s}$ ) |         | $\tau_2$ ( $\mu\text{s}$ ) |          | $\chi^2$ |       | $\tau$ ( $\mu\text{s}$ ) |          |
|---------|----------------------------|---------|----------------------------|----------|----------|-------|--------------------------|----------|
|         | before                     | after   | before                     | after    | before   | after | before                   | after    |
| LBN     | 77.3571                    | 73.4623 | 249.8923                   | 248.0094 | 1.191    | 1.252 | 106.8445                 | 103.5073 |
| NBN     | 84.8503                    | 79.8672 | 264.3951                   | 262.6132 | 1.129    | 1.258 | 118.2152                 | 113.1451 |
| KBN     | 95.5833                    | 92.8704 | 286.0412                   | 264.6992 | 1.249    | 1.218 | 118.5063                 | 116.7655 |
